# Supplementary material for: The long noncoding RNA ASNR regulates degradation of Bcl-2 mRNA through its interaction with AUF1
Source: PubMed Central journal article supplement (PMC5006016; doi:10.1038/srep32189), 2016-08-31
Supplement: srep32189-s1.pdf [file srep32189-s1.pdf]

**Title:** The long noncoding RNA ASNR regulates degradation of Bcl-2 mRNA through its interaction with AUF1

**Authors:** Jiahui Chen<sup>1,2,3</sup>, Lihui Liu<sup>1,2,3</sup>, Guifeng Wei<sup>1,2,3</sup>, Wei Wu<sup>1,2,3</sup>, Huaxia Luo<sup>1,2,3</sup>, Jiao Yuan<sup>1,2,3</sup>, Jianjun Luo<sup>1,2</sup>, and Runsheng Chen<sup>1,2,4\*</sup>

**Affiliations:**

<sup>1</sup>Key Laboratory of RNA Biology, Institute of Biophysics, Chinese Academy of Sciences, Beijing 100101, China

<sup>2</sup>Beijing Key Laboratory of Noncoding RNA, Institute of Biophysics, Chinese Academy of Sciences, Beijing 100101, China

<sup>3</sup>University of Chinese Academy of Sciences, Beijing 100049, China

<sup>4</sup>Research Network of Computational Biology, RNCB, Beijing, 100101, China

\* Correspondence to:

Runsheng Chen (+86-10-64888546, rschen@ibp.ac.cn)

This PDF file includes:

Supplementary Figures 1-7 and Supplementary Table.

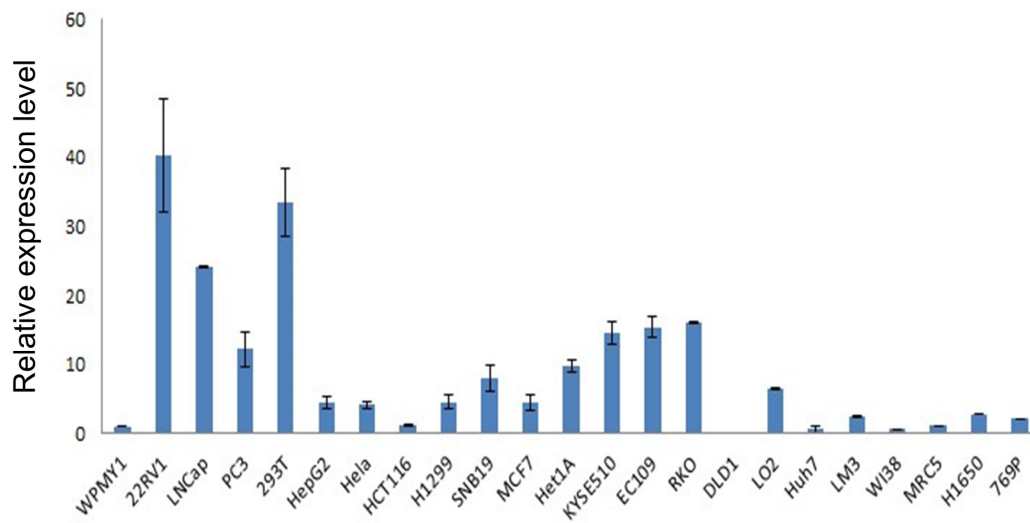

**Supplementary Fig.1 Relative expression of Lnc\_ASNR in different cells**

Quantification of Lnc\_ASNR expression in 23 kinds of cell lysates by qRT-PCR and GAPDH serve as controls for gene expression. Error bars represent SEM, n=3.

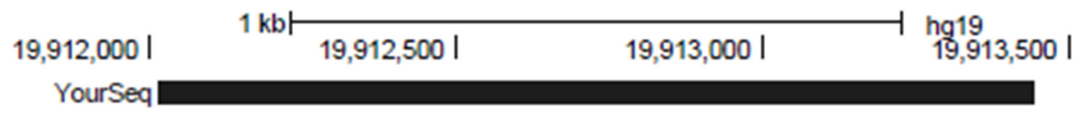

Chr14 >19913257-19912166

**Supplementary Fig.2 3' RACE and 5' RACE of Lnc\_ASNR.**

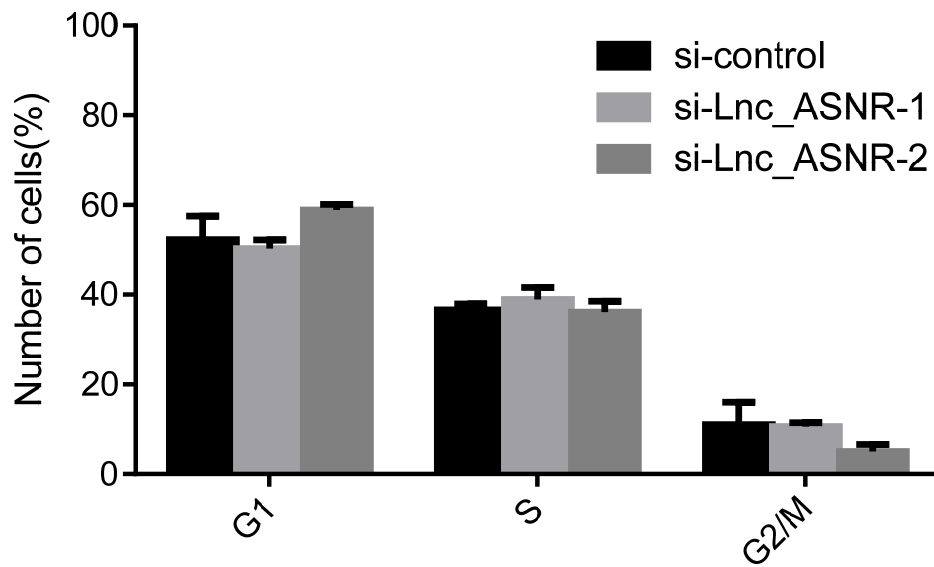

**Supplementary Fig.3 Lnc\_ASNR knockdown doesn't affect cell cycle regulation.**

Cell cycle results of Lnc\_ASNR knockdown were measured by flow cytometry. The X-axis represents cell cycle phases. The Y-axis gives the results from quantification (% cells) average of three independent replicate experiments. Bars indicate SEM.

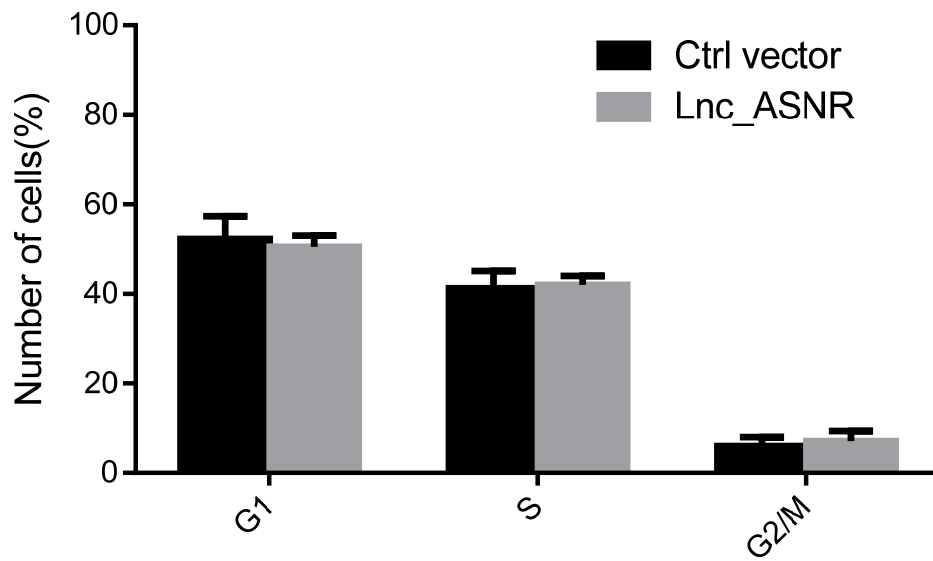

**Supplementary Fig.4 Overexpression of Lnc\_ASNR doesn't affect cell cycle regulation.**

Cell cycle results of Lnc\_ASNR overexpression were measured by flow cytometry. The X-axis represents cell cycle phases. The Y-axis gives the results from quantification (% cells) average of three independent replicate experiments. Bars indicate SEM.

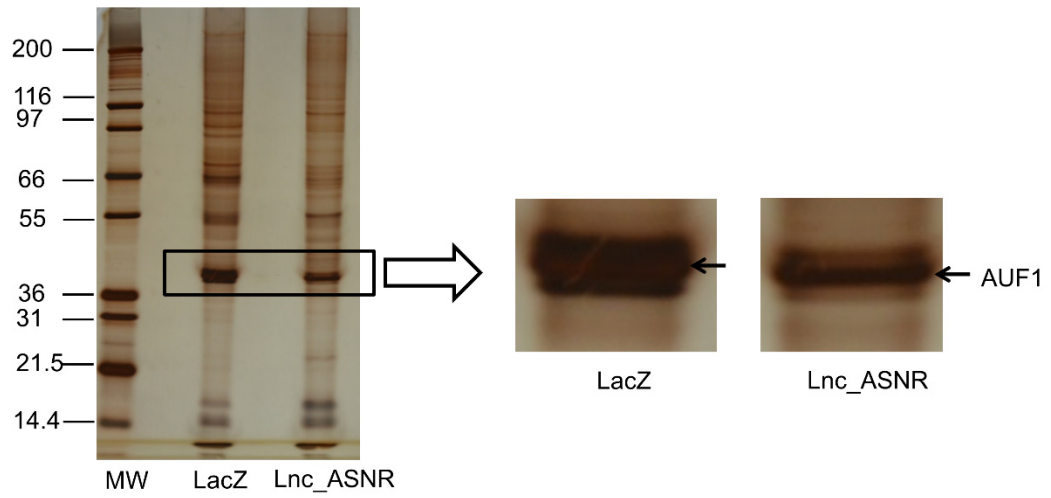

**Supplementary Fig.5 Silver stains gel of RNA-pulldown.**

SDS-PAGE gel of proteins pulled down by the Lnc\_ASNR and LacZ probes. Band indicated by arrows were submitted for mass spectrometry.

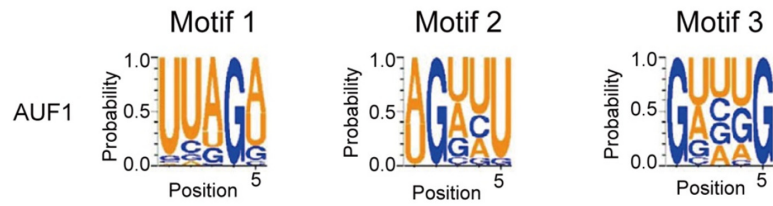

Motif 1 :

| No | start    | end      |
|----|----------|----------|
| 1  | 19912323 | 19912327 |
| 2  | 19912585 | 19912589 |

Motif 3 :

| No | start    | end      |
|----|----------|----------|
| 1  | 19912399 | 19912403 |
| 2  | 19912579 | 19912583 |
| 3  | 19913579 | 19913583 |

Motif 2 :

| No | start    | end      |
|----|----------|----------|
| 1  | 19912290 | 19912294 |
| 2  | 19912398 | 19912402 |
| 3  | 19912578 | 19912582 |
| 4  | 19912695 | 19912699 |
| 5  | 19912855 | 19912859 |
| 6  | 19913578 | 19913582 |
| 7  | 19913585 | 19913589 |

Example : Site 2 of motif 1

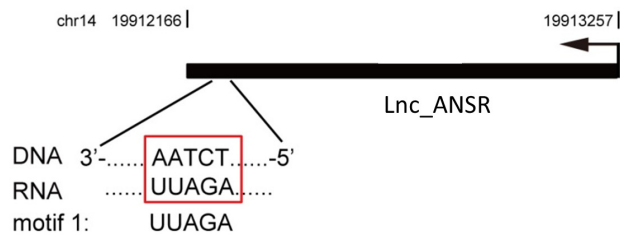

**Supplementary Fig.6 Computational search the binding motifs of AUF1 across the full-length of Lnc\_ASNR revealed the potential binding sites.**

The binding motifs of AUF1 information from published reference. The binding sites across the full length of Lnc\_ASNR were shown on the chromatin location. Example of binding position (UUAGA) of AUF1 showed that AUF1 binds to sequence UUAGA of Lnc\_ASNR.

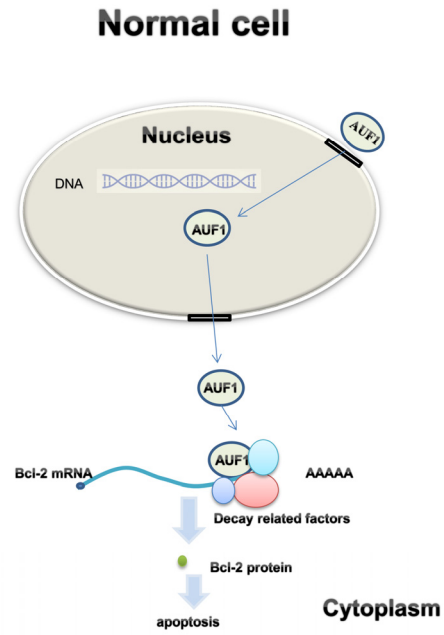

**Supplementary Fig.7 The reported model of AUF1 mediated Bcl-2 degradation in normal cell.**

In normal cells, AUF1 binds to the Bcl-2 mRNA ARE region in the cytoplasm, which resulting in Bcl-2 mRNA decay.



## Supplementary Table

### RACE primers

Lnc\_ASNR-5'RACE-R1 5' GAAGAACAACAAATAAGACTTAAGAGGAAAAGGAAT 3'  
Lnc\_ASNR-5'RACE-R2 5' TGCAGCCTACTAAATCAGAATGAAAATAGA 3'  
Lnc\_ASNR-3'RACE-F1 5' AGTTCCTGCTTTCTTGTCAAAAATTGAAG 3'  
Lnc\_ASNR-3'RACE-F2 5' CTTCTAGGAACCCATCATCCAAGAC 3'

### Northern Blotting Probe Primers

Lnc\_ASNR LNA probe: /5DigN/TAATGGTGTAAGCAATGTGGAT the probe designed from exiqon webset

hGAPDH\_F GGAAGGTGAAGGTCGGAGT capital nucleotides indicated T7 promoter sequences  
hGAPDH\_T7\_R agtcatTAATACGACTCACTATAGGAAGGGGTGCTAAGCAGTTGGT

### qPCR primers

Lnc\_ASNR\_q\_F GAGAATTCCTCTGGTGGCTAAA  
Lnc\_ASNR\_q\_R GGAAGTGAATCTCACTGGACAA  
AUF1-q-F ATGTCGGAGGAGCAGTTCGGCGGGGAC  
AUF1-q-R TTAGTATGGTTTGTAGCTATTTTGATG  
Bcl-2-q-F GGAGGATTGTGGCCTTCTTT  
Bcl-2-q-R GTTCAGGTACTCAGTCATCCAC  
linc01296-Qper-F TAATGATCACCTGCGCCTTC  
linc01296-Qper-R AGCAACCATCGCCCTTATC  
linc01296.1-Qper-F CATAGGTCACCAGCTTCACTTC  
linc01296.1-Qper-R CACTCCATACCTTGCTCAACTAC  
BMSF18/17-Qper-F GAAACCAGTGGGTGAGAAAGA  
BMSF18/17-Qper-R CAGGCTGCATCTCCACTAATAC  
DUXAP10-Qper-F GCAAGGTTTCTGAGGGACTT  
DUXAP10-Qper-R TCACCATGTTCTGGCTCTTG  
GAPDH\_q\_F TGCCATCAATGACCCCTTC  
GAPDH\_q\_R CATCGCCCCACTTGATTTTG  
U1\_q\_F GGGAGATACCATGATCACGAAGGT  
U1\_q\_R CCACAAATTATGCAGTCGAGTTTCCC  
β-actin\_q\_F ATTTAAAACTGGAACGGTGAAGGT  
β-actin\_q\_R CTGTAACAACGCATCTCATATTTGG

### Construct primers

Lnc\_ASNR-F 5' GG **GGTACC** CAGGAAACTCCAAACTGTCCAAGGA 3'  
 Lnc\_ASNR-R 5' CG **GGATCC** GTAACAACTTTATTTTTTGGATGAGTGAAGACT 3'

### siRNAs

|               |                                                  |                                                        |                                       |
|---------------|--------------------------------------------------|--------------------------------------------------------|---------------------------------------|
|               | sense(5'-3')                                     | antisense (5'-3')                                      | <b>r represents ribonucleic acid.</b> |
| si-Lnc_ASNR-1 | rGrGrArGrArArUrGrCrArGrArArUrGrGrUrCrArGrArCrUAC | rGrGrArGrArArUrGrCrArGrArArUrGrGrUrCrArGrArCrUAC       |                                       |
| si-Lnc_ASNR-2 | rGrCrArGrGrArArCrUrUrGrArUrUrArCrUrUrUrGrArGrUGC | rGrCrArCrUrCrArArArGrUrArArUrCrArArGrUrUrCrCrUrGrCrUrU |                                       |
| si-Lnc_ASNR-3 | rArCrArCrCrArUrUrArGrGrCrArUrArGrArUrUrCrArGrUGT | rArCrArCrUrGrArArUrCrUrArUrGrCrCrUrArArUrGrGrUrGrUrArA |                                       |
| si-AUF1-1     | rCrCrArCrArArUrGrUrUrGrGrUrCrUrUrArGrUrArArArUGT | rArCrArUrUrUrArCrUrArArGrArCrCrArArCrArUrUrGrUrGrGrUrA |                                       |
| si-AUF1-2     | rArCrArArUrArUrCrArGrCrArArCrArGrCrArArCrArGrUGG | rCrCrArCrUrGrUrUrGrCrUrGrUrUrGrCrUrGrArUrArUrUrGrUrUrC |                                       |

### Pulldown 3' biotinylated probes

| Target                               | Probe Name | Sequence of Oligo (5'- to -3') |
|--------------------------------------|------------|--------------------------------|
| <b>Lnc_ASNR</b>                      | ASNR_p1    | caacagaactatctccttgg           |
|                                      | ASNR_p2    | cacctgagatttgcctac             |
|                                      | ASNR_p3    | ccaagactgaggcactaaaa           |
|                                      | ASNR_p4    | ctgtgacagtggcagaagaa           |
|                                      | ASNR_p5    | ctcaagatgaaagactccct           |
|                                      | ASNR_p6    | gcagaatggcagactacca            |
|                                      | ASNR_p7    | ctatgcctaagtgtgaagc            |
|                                      | ASNR_p8    | atctggatcaagcagtttgg           |
|                                      | ASNR_p9    | gtgtgcagcctactaaatcag          |
| <b>Non-Targetting Control (LacZ)</b> | lacZ_p1    | GCCAGTGAATCCGTAATCAT           |
|                                      | lacZ_p2    | AATGTGAGCGAGTAACAACC           |
|                                      | lacZ_p3    | GATCTTCCAGATAACTGCCG           |
|                                      | lacZ_p4    | GTCATCGATAATTTACCG             |
|                                      | lacZ_p5    | TTAACGCCTCGAATCAGCAA           |
|                                      | lacZ_p6    | ATTTGATCCAGCGATACAGC           |
|                                      | lacZ_p7    | GGGTTGCCGTTTTCATCATA           |
|                                      | lacZ_p8    | CACTTACGCCAATGTCGTTA           |
